# Supplementary material for: Nursing Home Residents’ Perceptions of Challenges and Coping Strategies during COVID-19 Pandemic in China
Source: Int J Environ Res Public Health. 2023 Jan 13;20(2):1485. doi: 10.3390/ijerph20021485 (PMC9862260; doi:10.3390/ijerph20021485)
Supplement: Supplementary file 1 [file ijerph-20-01485-s001.zip › Supplementary S2 Thematic analysis process applied to the study.xls]

## Sheet: Table 1
Table S1. Thematic analysis process applied to the study.
Step 1	Step 2	Step 3	Step 4	Step 5
Coded transcripts	Meaningful codes generated	Potential subthemes	Reviewing themes	Themes
“I worried about the fast-spreading of the virus. There were no effective drugs for the virus. I worried about my children to be infected as they are working in the hospital.” (participant 9)	Worried	Change of emotion	Perceived challenges: mental stress	Mental stress and coping strategies
“I haven't gone outside since January this year… we had to stay in our room. I had no choice because of the pandemic, I want to go out to buy something.” (participant 4)	Couldn’t go outside in a long time	The inconvenience of daily life	Perceived challenges: Long duration of nursing home closure	Self-regulation to respond to lockdown
“I do exercise in my room sometimes and I also participated in Tai Chi every day organized by the nursing home. We need to wear masks and be kept far from each other. I have a good emotion when I took part in these activities.” (participant 6)	Doing health exercises	Carry out self-entertainment activities	Applied coping strategies: Engage in group exercise	The lack of social connection and coping strategies
“If I have any health problems, I will be treated very well. The service is very fast, and the attitude of the medical staff is very good...If you feel uncomfortable, just make a call and the doctor will come. After observation, the doctor will analyze whether you need to go to the hospital, which is very convenient. I feel very comfortable living here.” (participant 10)	Nursing homes provide quick medical service	Provide integrated care	Applied coping strategies: The medical management and nursing care model	The need for medical care services and coping strategies
